# Supplementary material for: Digital Geological Mapping to Facilitate Field Data Collection, Integration, and Map Production in Zhoukoudian, China
Source: MDPI journal article supplement (doi:10.3390/app11115041), 2021-05-29

# Supplementary Materials: Digital Geological Mapping to Facilitate Field Data Collection, Integration, and Map Production in Zhoukoudian, China

Chengbin Wang \*, Xinqing Wang and Jianguo Chen

State Key Laboratory of Geological Processes and Mineral Resources & School of Earth Resources, China University of Geosciences, Wuhan 430074, China; wangxq@cug.edu.cn (X.W.); jgchen@cug.edu.cn (J.C.)

\* Correspondence: wangchb@cug.edu.cn

**Table S1.** The photos of typical geological outcrops in Zhoukoudian area.

| Some typical outcrops         | Photo                                                                                |
|-------------------------------|--------------------------------------------------------------------------------------|
| Pt <sub>zw</sub> <sup>4</sup> |   |
| Pt <sub>zh</sub>              |  |
| Pt <sub>zt</sub>              |  |

Pt<sub>2x</sub><sup>1</sup>

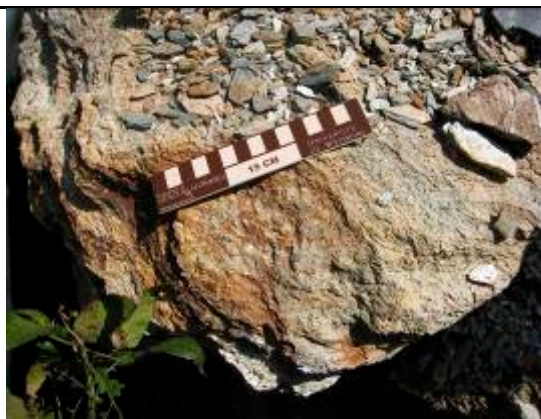

Pt<sub>3x</sub><sup>2</sup>

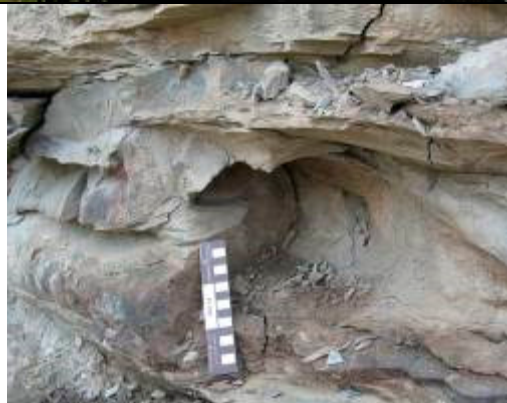

O<sub>1m</sub>

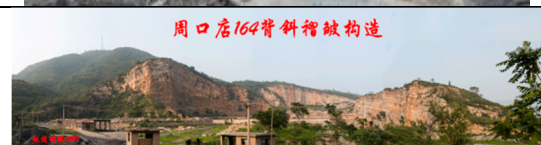

Є<sub>1f</sub>

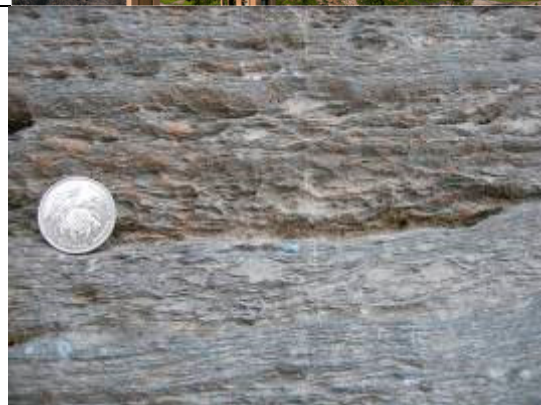

Є<sub>1+2m</sub>

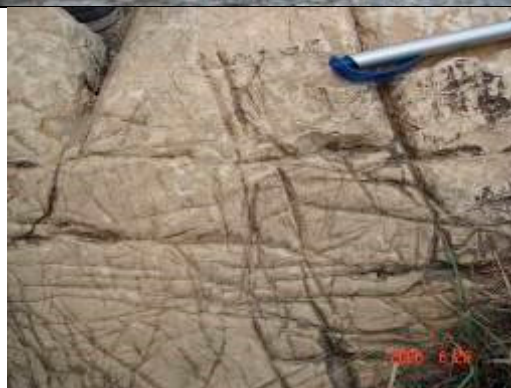



∈1x

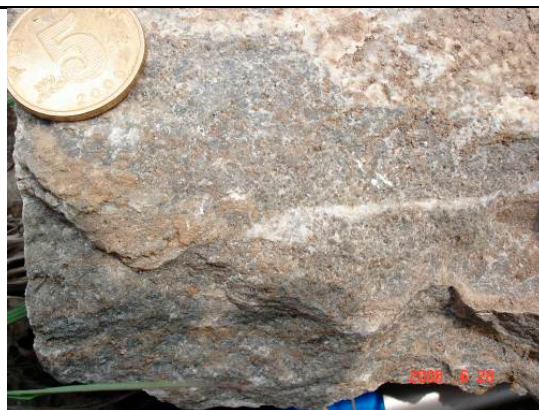

∈2zh

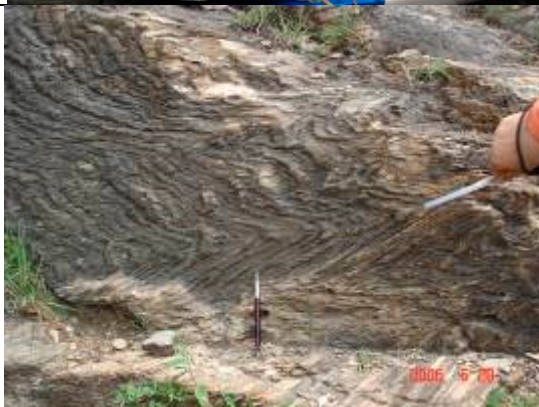

Quartz diorite

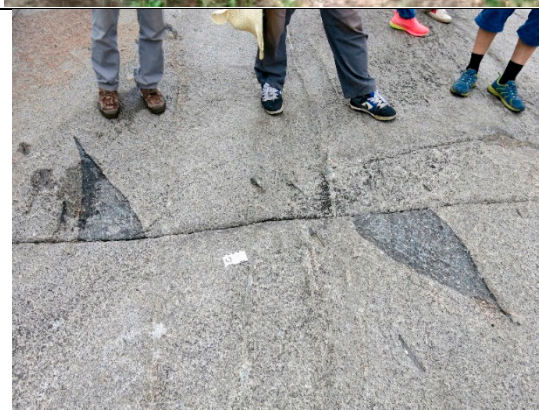

Pegmatite

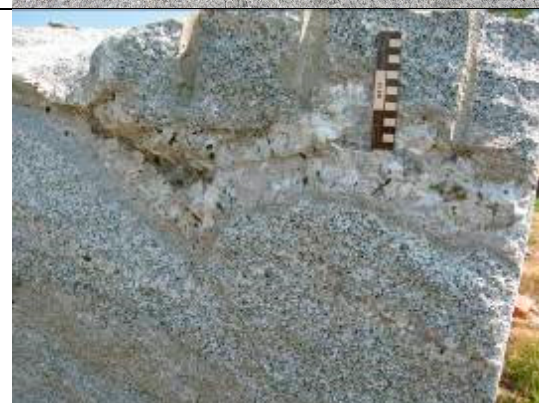

Xenolith

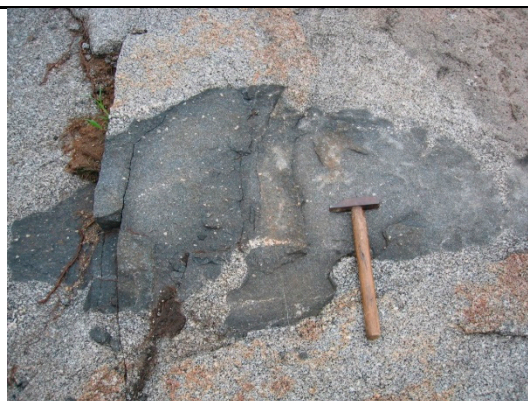

Ductile structure

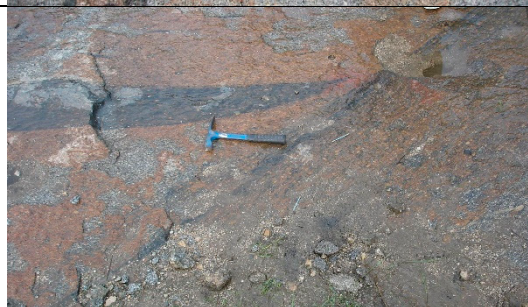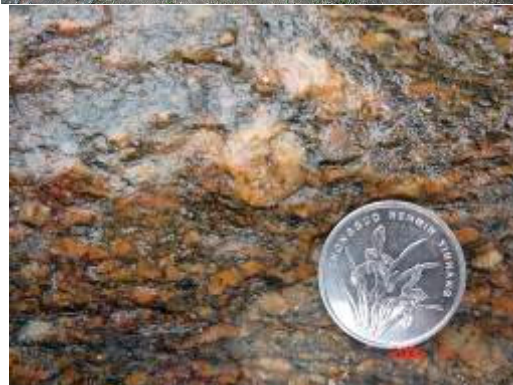

Fault

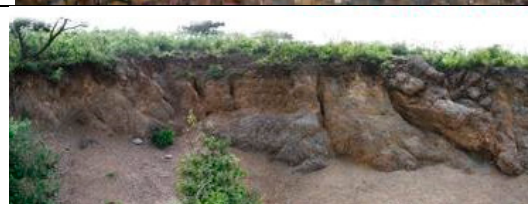

Fold

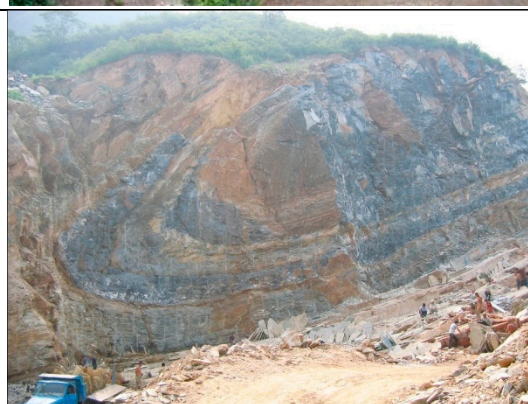



Joint

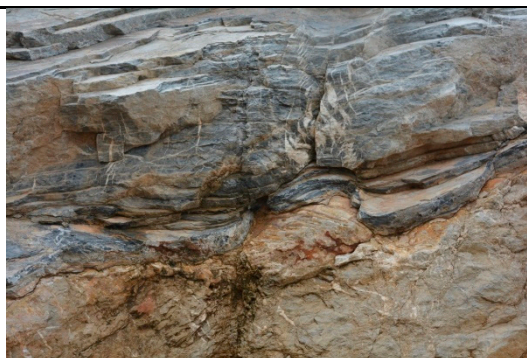

Cleavage

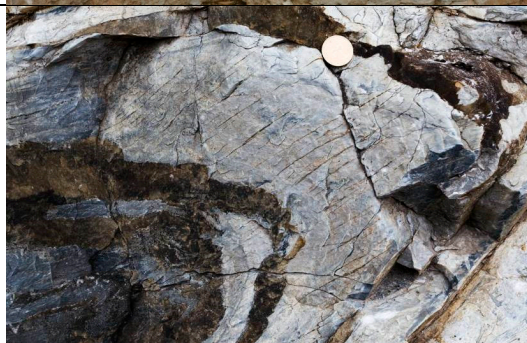

Supplement: s1 [file s1]
